# Supplementary material for: How much can we save? Impact of different emission scenarios on future snow cover in the Alps
Source: Copernicus journal article supplement (doi:10.5194/tc-11-517-2017), 2017-02-16
Supplement: Supplementary file [file tc-11-517-2017-supplement.pdf]

Supplement of The Cryosphere, 11, 517–529, 2017  
<http://www.the-cryosphere.net/11/517/2017/>  
doi:10.5194/tc-11-517-2017-supplement  
© Author(s) 2017. CC Attribution 3.0 License.

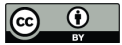

*Supplement of*

## **How much can we save? Impact of different emission scenarios on future snow cover in the Alps**

**Christoph Marty et al.**

*Correspondence to:* Christoph Marty (marty@slf.ch)

The copyright of individual parts of the supplement might differ from the CC-BY 3.0 licence.

**Table S1: Root mean squared error (RSME) calculated for snow depths greater than 0.01 m for selected stations in the Aare and Grisons catchment during the 13 years of the reference period.**

| Stat          | Altitude | 2000 | 2001 | 2002 | 2003 | 2004 | 2005 | 2006 | 2007 | 2008 | 2009 | 2010 | 2011 | 2012 |
|---------------|----------|------|------|------|------|------|------|------|------|------|------|------|------|------|
| Chur          | 550 m    | 0.04 | 0.03 | 0.03 | 0.03 | 0.03 | 0.03 | 0.03 | 0.06 | 0.03 | 0.03 | 0.03 | 0.03 | 0.03 |
| Bern          | 550 m    | 0.09 | 0.04 | 0.08 | 0.05 | 0.06 | 0.06 | 0.08 | 0.08 | 0.03 | 0.08 | 0.08 | 0.09 | 0.05 |
| Disentis      | 1090 m   | 0.18 | 0.17 | 0.18 | 0.18 | 0.16 | 0.17 | 0.18 | 0.19 | 0.17 | 0.17 | 0.18 | 0.15 | 0.18 |
| Arosa         | 1320 m   | 0.42 | 0.41 | 0.41 | 0.44 | 0.42 | 0.42 | 0.43 | 0.47 | 0.43 | 0.43 | 0.44 | 0.40 | 0.44 |
| Samedan       | 1750 m   | 0.31 | 0.29 | 0.31 | 0.31 | 0.29 | 0.31 | 0.32 | 0.31 | 0.31 | 0.30 | 0.30 | 0.26 | 0.33 |
| Weissfluhjoch | 2540 m   | 0.98 | 0.95 | 1.02 | 1.02 | 0.98 | 1.03 | 1.02 | 1.04 | 1.05 | 1.00 | 0.98 | 1.01 | 1.03 |

**Table S2: Mean number of snow days (snow depth at least 5 cm) for the reference and the three future time periods based on the A2 scenario for 5 stations in the Aare region (above) and the Grisons region (below).**

| Station       | Elevation | Reference | 2035 | 2060 | 2085 |
|---------------|-----------|-----------|------|------|------|
| Bern          | 542 m     | 40        | 13   | 5    | 0    |
| Interlaken    | 568 m     | 41        | 14   | 6    | 0    |
| Grindelwald   | 1034 m    | 101       | 72   | 37   | 14   |
| Adelboden     | 1350 m    | 139       | 107  | 75   | 35   |
| Mürren        | 1650 m    | 173       | 148  | 116  | 77   |
| Chur          | 593 m     | 39        | 14   | 5    | 0    |
| Disentis      | 1130 m    | 98        | 68   | 40   | 18   |
| Davos         | 1560m     | 157       | 123  | 86   | 49   |
| Samedan       | 1721 m    | 165       | 139  | 101  | 61   |
| Weissfluhjoch | 2690 m    | 254       | 228  | 197  | 163  |

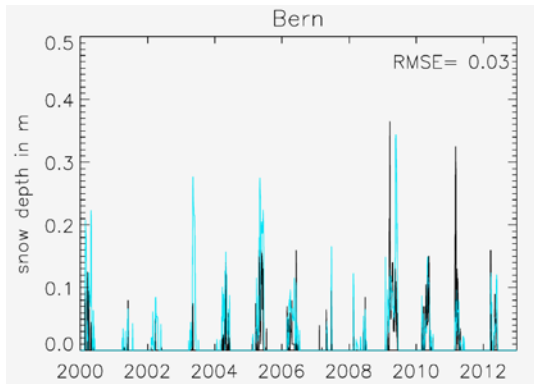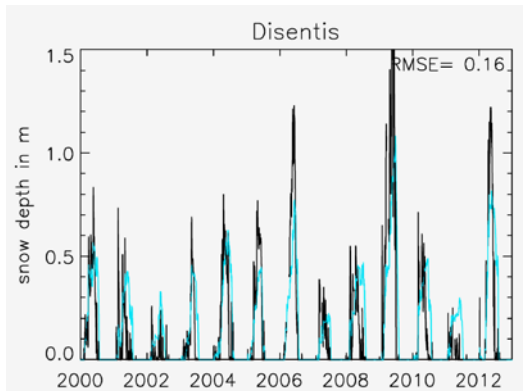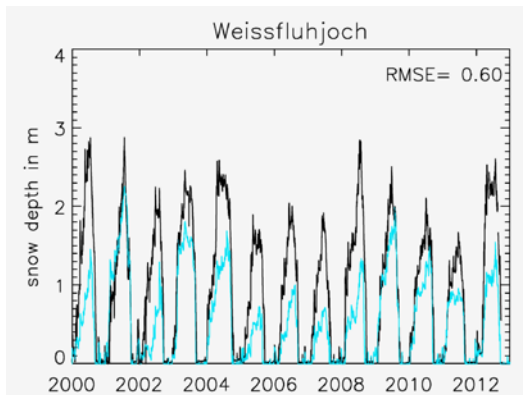

5

**Figure S1: Measured (black) and simulated snow depth (grey) for Bern (542 m), Disentis (1190 m) and Weissfluhjoch (2540 m). Note: the scale of the y-axis is different for each station.**

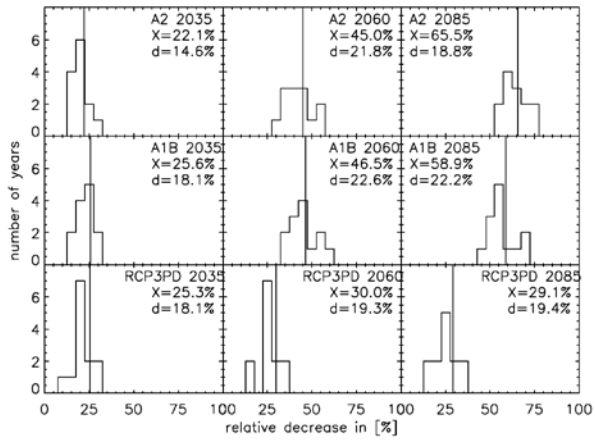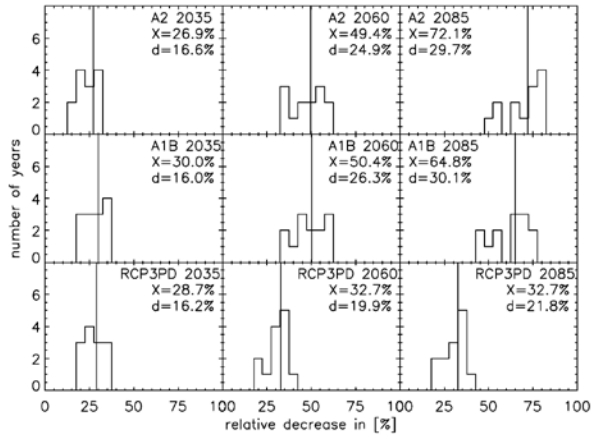

5 **Figure S2: Distribution of the annual relative decreases of the snow depth for A2, A1B and RCP3PD and the three different future time periods (2020-49, 2045-74, 2070-99) for Aare (top) and Grisons (bottom) based on the inter-annual variability of the reference period. The value X corresponds to the spatial and temporal mean relative decrease in [%], which is visualized in Figure 3. The value d defines the difference between the highest and the lowest relative decrease within the scenario period. The number of the simulated years is N=13.**

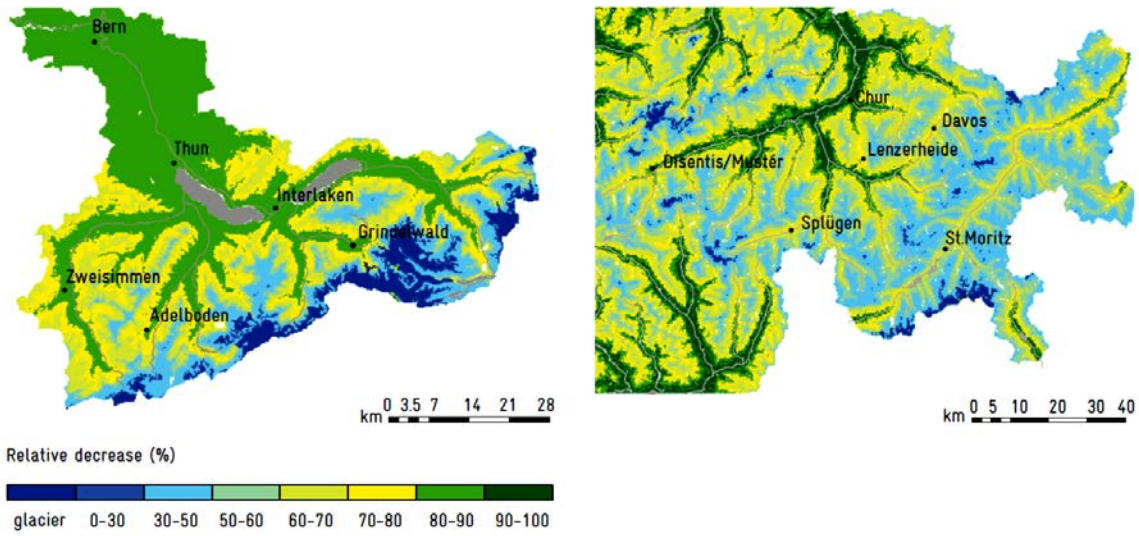

5

Figure S3: Relative decrease for February 1 snow depth during the last time period (2085) and the A1B scenario for the Aare region (left) and the Grisons region (right).

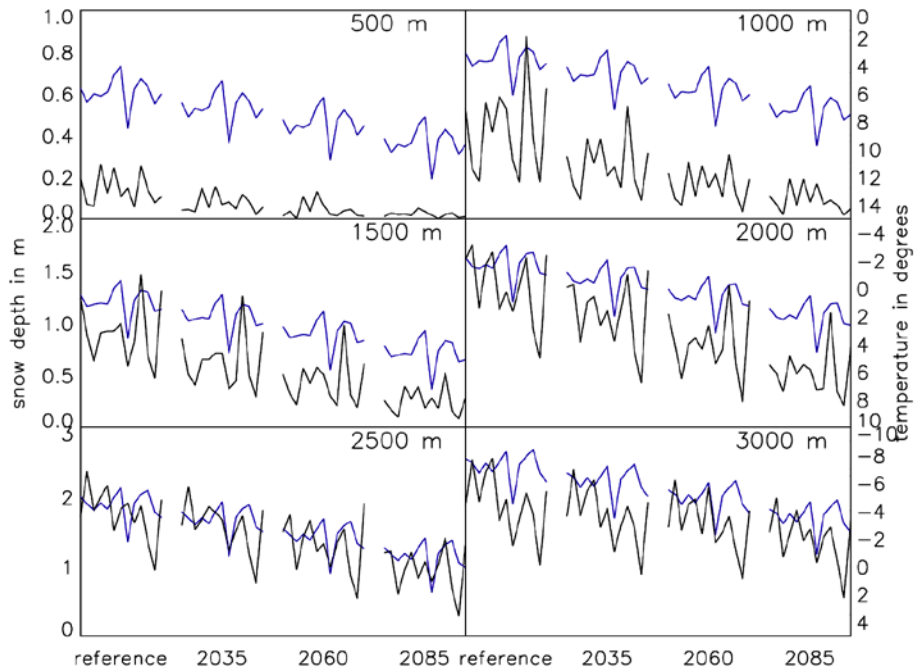

5 **Figure S4: Current and future variability of maximum snow depth (solid line) and mean winter temperature (dashed line) from November to April for 6 elevation zones and the A2 scenario for the Aare region. Note, the scale of the y-axis changes with elevation.**

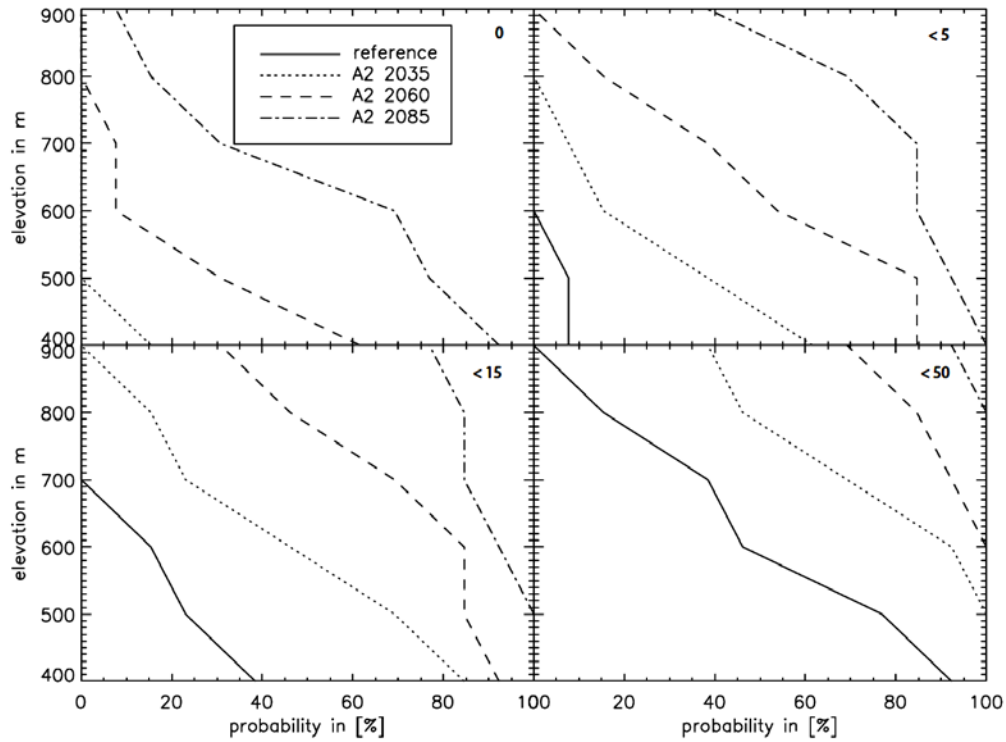

5 **Figure S5: Probability of winter with 0 (upper left), less than 5 (upper right), less than 15 (lower left) and less than 50 (lower right) snow days for Grisons.**



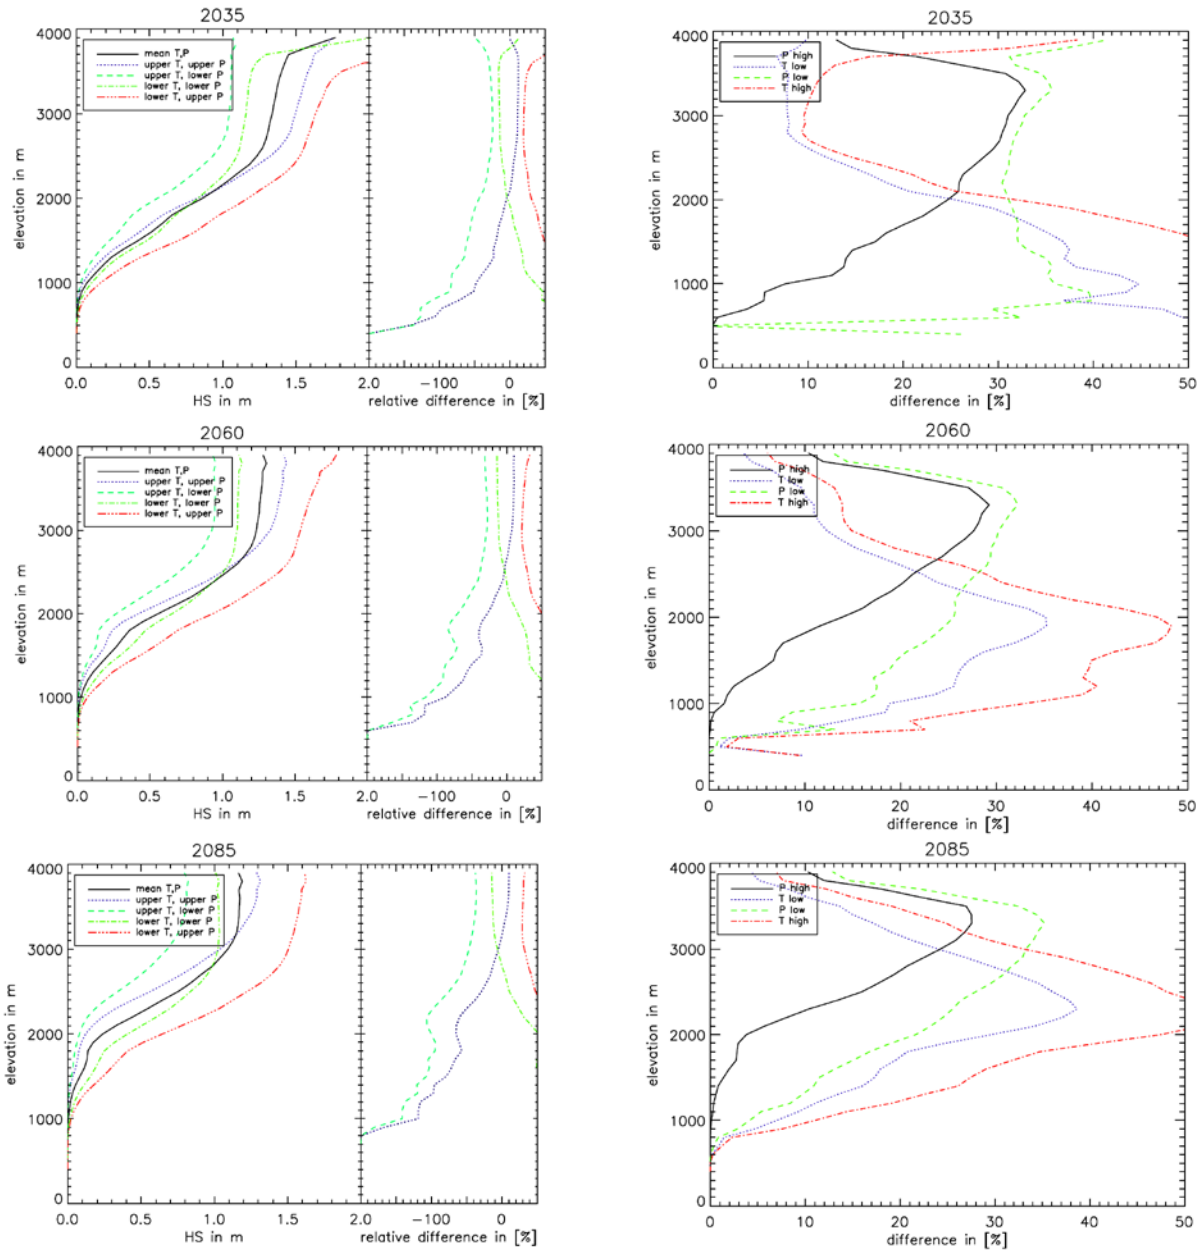

5 **Figure S6: Elevation dependence of absolute snow depth for five possible T-P combinations (left) and decrease relative to the mean T, mean P configuration (left panels). Elevation dependence of the relative snow depth difference (%) for four different combinations T-P (right panels). "T high" means the difference of the upper T - lower T at the upper P configuration. "P low" means the difference of the upper P - lower P at the lower T configuration. This is shown for 2035 (top), 2060 (middle) and 2085 (bottom) based on the A2 emission scenario in the Aare region.**
